# Supplementary material for: The relationship between psychosocial circumstances and injuries in adolescents: An analysis of 87,269 individuals from 26 countries using the Global School-based Student Health Survey
Source: PubMed Central journal article supplement (PMC8478259; doi:10.1371/journal.pmed.1003722), 2021-09-28
Supplement: pmed.1003722.s001.pdf [file pmed.1003722.s001.pdf]

STROBE Statement—checklist of items that should be included in reports of observational studies

|                              | Item No | Recommendation                                                                                                                                                                                                                                                                                                                                                                                                                                                                                                                                                                                                                                                                                   | Page No.                                                                                          |
|------------------------------|---------|--------------------------------------------------------------------------------------------------------------------------------------------------------------------------------------------------------------------------------------------------------------------------------------------------------------------------------------------------------------------------------------------------------------------------------------------------------------------------------------------------------------------------------------------------------------------------------------------------------------------------------------------------------------------------------------------------|---------------------------------------------------------------------------------------------------|
| <b>Title and abstract</b>    | 1       | (a) Indicate the study's design with a commonly used term in the title or the abstract                                                                                                                                                                                                                                                                                                                                                                                                                                                                                                                                                                                                           | Title. Abstract (Methods and Findings)                                                            |
|                              |         | (b) Provide in the abstract an informative and balanced summary of what was done and what was found                                                                                                                                                                                                                                                                                                                                                                                                                                                                                                                                                                                              | Abstract (Methods and Findings; all paragraphs)                                                   |
| <b>Introduction</b>          |         |                                                                                                                                                                                                                                                                                                                                                                                                                                                                                                                                                                                                                                                                                                  |                                                                                                   |
| Background/rationale         | 2       | Explain the scientific background and rationale for the investigation being reported                                                                                                                                                                                                                                                                                                                                                                                                                                                                                                                                                                                                             | Abstract (Background), Author's summary (Why was this study done?), Introduction (all paragraphs) |
| Objectives                   | 3       | State specific objectives, including any prespecified hypotheses                                                                                                                                                                                                                                                                                                                                                                                                                                                                                                                                                                                                                                 | Abstract (Background), Author's summary (Why was this study done?), Introduction (paragraph 4)    |
| <b>Methods</b>               |         |                                                                                                                                                                                                                                                                                                                                                                                                                                                                                                                                                                                                                                                                                                  |                                                                                                   |
| Study design                 | 4       | Present key elements of study design early in the paper                                                                                                                                                                                                                                                                                                                                                                                                                                                                                                                                                                                                                                          | Methods (all paragraphs)                                                                          |
| Setting                      | 5       | Describe the setting, locations, and relevant dates, including periods of recruitment, exposure, follow-up, and data collection                                                                                                                                                                                                                                                                                                                                                                                                                                                                                                                                                                  | Methods (paragraph 1 and 2), Appendix Table 2                                                     |
| Participants                 | 6       | (a) <i>Cohort study</i> —Give the eligibility criteria, and the sources and methods of selection of participants. Describe methods of follow-up<br><i>Case-control study</i> —Give the eligibility criteria, and the sources and methods of case ascertainment and control selection. Give the rationale for the choice of cases and controls<br><i>Cross-sectional study</i> —Give the eligibility criteria, and the sources and methods of selection of participants<br>(b) <i>Cohort study</i> —For matched studies, give matching criteria and number of exposed and unexposed<br><i>Case-control study</i> —For matched studies, give matching criteria and the number of controls per case | Methods (paragraph 1, 2 and 8)                                                                    |
| Variables                    | 7       | Clearly define all outcomes, exposures, predictors, potential confounders, and effect modifiers. Give diagnostic criteria, if applicable                                                                                                                                                                                                                                                                                                                                                                                                                                                                                                                                                         | Methods (paragraphs 3 to 9), Panel 1, Appendix Table 1                                            |
| Data sources/<br>measurement | 8*      | For each variable of interest, give sources of data and details of methods of assessment (measurement). Describe                                                                                                                                                                                                                                                                                                                                                                                                                                                                                                                                                                                 | Method (paragraphs 1 to 9), Panel 1,                                                              |

|                        |     | comparability of assessment methods if there is more than one group                                                                                                                                                                                                                                       | Appendix Table 1                                                                                                                                      |
|------------------------|-----|-----------------------------------------------------------------------------------------------------------------------------------------------------------------------------------------------------------------------------------------------------------------------------------------------------------|-------------------------------------------------------------------------------------------------------------------------------------------------------|
| Bias                   | 9   | Describe any efforts to address potential sources of bias                                                                                                                                                                                                                                                 | This is a secondary analysis of previously collected data. Sources of bias are explored in the limitations section; Discussion (paragraphs 11 and 12) |
| Study size             | 10  | Explain how the study size was arrived at                                                                                                                                                                                                                                                                 | This is a secondary analysis of previously collected data, no sample size calculation was appropriate for this analysis                               |
| Quantitative variables | 11  | Explain how quantitative variables were handled in the analyses. If applicable, describe which groupings were chosen and why                                                                                                                                                                              | All variables were categorical.                                                                                                                       |
| Statistical methods    | 12  | (a) Describe all statistical methods, including those used to control for confounding                                                                                                                                                                                                                     | Methods (paragraphs 10 to 14)                                                                                                                         |
|                        |     | (b) Describe any methods used to examine subgroups and interactions                                                                                                                                                                                                                                       | NA                                                                                                                                                    |
|                        |     | (c) Explain how missing data were addressed                                                                                                                                                                                                                                                               | Methods (paragraph 14)                                                                                                                                |
|                        |     | (d) <i>Cohort study</i> —If applicable, explain how loss to follow-up was addressed<br><i>Case-control study</i> —If applicable, explain how matching of cases and controls was addressed<br><i>Cross-sectional study</i> —If applicable, describe analytical methods taking account of sampling strategy | Methods (paragraph 10)                                                                                                                                |
|                        |     | (e) Describe any sensitivity analyses                                                                                                                                                                                                                                                                     | Methods (paragraph 11)                                                                                                                                |
| <b>Results</b>         |     |                                                                                                                                                                                                                                                                                                           |                                                                                                                                                       |
| Participants           | 13* | (a) Report numbers of individuals at each stage of study—eg numbers potentially eligible, examined for eligibility, confirmed eligible, included in the study, completing follow-up, and analysed                                                                                                         | Results (paragraph 1), Table 1, Appendix Table 2                                                                                                      |
|                        |     | (b) Give reasons for non-participation at each stage                                                                                                                                                                                                                                                      | NA                                                                                                                                                    |
|                        |     | (c) Consider use of a flow diagram                                                                                                                                                                                                                                                                        | NA                                                                                                                                                    |
| Descriptive data       | 14* | (a) Give characteristics of study participants (eg demographic, clinical, social) and information on exposures and potential confounders                                                                                                                                                                  | Table 1, Appendix Table 3, Appendix Table 5a-d                                                                                                        |
|                        |     | (b) Indicate number of participants with missing data for each variable of interest                                                                                                                                                                                                                       | NA                                                                                                                                                    |
|                        |     | (c) <i>Cohort study</i> —Summarise follow-up time (eg, average                                                                                                                                                                                                                                            |                                                                                                                                                       |

|                   |     |                                                                                                                                                                                                              |                                                                                                            |
|-------------------|-----|--------------------------------------------------------------------------------------------------------------------------------------------------------------------------------------------------------------|------------------------------------------------------------------------------------------------------------|
|                   |     | and total amount)                                                                                                                                                                                            |                                                                                                            |
| Outcome data      | 15* | <i>Cohort study</i> —Report numbers of outcome events or summary measures over time                                                                                                                          |                                                                                                            |
|                   |     | <i>Case-control study</i> —Report numbers in each exposure category, or summary measures of exposure                                                                                                         |                                                                                                            |
|                   |     | <i>Cross-sectional study</i> —Report numbers of outcome events or summary measures                                                                                                                           | Results (paragraph 2), Table 1, Table 3                                                                    |
| Main results      | 16  | (a) Give unadjusted estimates and, if applicable, confounder-adjusted estimates and their precision (eg, 95% confidence interval). Make clear which confounders were adjusted for and why they were included | Results (paragraphs 3-7, 8-15), Tables 2, 4 and 5, Appendix Table 4, Figures 1 and 2 and Appendix Figure 1 |
|                   |     | (b) Report category boundaries when continuous variables were categorized                                                                                                                                    | NA                                                                                                         |
|                   |     | (c) If relevant, consider translating estimates of relative risk into absolute risk for a meaningful time period                                                                                             | NA                                                                                                         |
| Other analyses    | 17  | Report other analyses done—eg analyses of subgroups and interactions, and sensitivity analyses                                                                                                               | Results (paragraph 7), Table 2, Appendix Table 4                                                           |
| Discussion        |     |                                                                                                                                                                                                              |                                                                                                            |
| Key results       | 18  | Summarise key results with reference to study objectives                                                                                                                                                     | Discussion (paragraphs 1-10, 14-15)                                                                        |
| Limitations       | 19  | Discuss limitations of the study, taking into account sources of potential bias or imprecision. Discuss both direction and magnitude of any potential bias                                                   | Discussion (paragraph 11-13)                                                                               |
| Interpretation    | 20  | Give a cautious overall interpretation of results considering objectives, limitations, multiplicity of analyses, results from similar studies, and other relevant evidence                                   | Discussion (throughout and paragraphs 14-15)                                                               |
| Generalisability  | 21  | Discuss the generalisability (external validity) of the study results                                                                                                                                        | Discussion (paragraph 15)                                                                                  |
| Other information |     |                                                                                                                                                                                                              |                                                                                                            |
| Funding           | 22  | Give the source of funding and the role of the funders for the present study and, if applicable, for the original study on which the present article is based                                                | Funding Statement                                                                                          |

\*Give information separately for cases and controls in case-control studies and, if applicable, for exposed and unexposed groups in cohort and cross-sectional studies.

**Note:** An Explanation and Elaboration article discusses each checklist item and gives methodological background and published examples of transparent reporting. The STROBE checklist is best used in conjunction with this article (freely available on the Web sites of PLoS Medicine at <http://www.plosmedicine.org/>, Annals of Internal Medicine at <http://www.annals.org/>, and Epidemiology at <http://www.epidem.com/>). Information on the STROBE Initiative is available at [www.strobe-statement.org](http://www.strobe-statement.org).
